# Supplementary material for: The Infant-Derived Bifidobacterium bifidum Strain CNCM I-4319 Strengthens Gut Functionality
Source: PubMed Central journal article supplement (PMC7565306; doi:10.3390/microorganisms8091313), 2020-08-28
Supplement: microorganisms-08-01313-s001.pdf [file microorganisms-08-01313-s001.pdf]

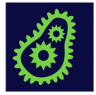

Article

# The Infant-Derived *Bifidobacterium bifidum* Strain CNCM I-4319 Strengthens Gut Functionality

Rebeca Martín <sup>1,†</sup>, Francesca Bottacini <sup>2,†</sup>, Muireann Egan <sup>2</sup>, Celia Chamignon <sup>1</sup>,  
Valérie Tondereau <sup>3</sup>, Raphaël Moriez <sup>4</sup>, Jan Knol <sup>5,6</sup>, Philippe Langella <sup>1</sup>, Hélène Eutamene <sup>3</sup>,  
Tamara Smokvina <sup>4,\*</sup> and Douwe van Sinderen <sup>1,7,\*</sup>

<sup>1</sup> Commensal and Probiotics-Host Interactions Laboratory, Micalis Institute, INRA, AgroParisTech, Université Paris-Saclay, 91190 Jouy-en-Josas, France; rebeca.martin-rosique@inrae.fr (R.M.); celia.chamignon@inrae.fr (C.C.); philippe.langella@inrae.fr (P.L.)

<sup>2</sup> APC Microbiome Ireland, University College Cork, Cork T12 K8AF, Ireland; f.bottacini@uic.ie (F.B.); muireann.egan@uic.ie (M.E.)

<sup>3</sup> Neurogastroenterology & Nutrition Group, Toxalim INRAE, Université de Toulouse, ENVT, INP-Purpan, 31058 Toulouse, France; valerie.tondereau@inrae.fr (V.T.); helene.eutamene@inra.fr (H.E.)

<sup>4</sup> Danone Nutricia Research, 91767 Palaiseau, France; raphael.moriez@danone.com

<sup>5</sup> Danone Nutricia Research, 3584 CT Utrecht, The Netherlands; jan.knol@danone.com

<sup>6</sup> Laboratory of Microbiology, Wageningen University, 6708 PB Wageningen, The Netherlands

<sup>7</sup> School of Microbiology, University College Cork, Cork T12 K8AF, Ireland

\* Correspondence: tamara.smokvina@danone.com (T.S.); d.vansinderen@uic.ie (D.v.S.)

† Joint first author.

## Supplementary Material

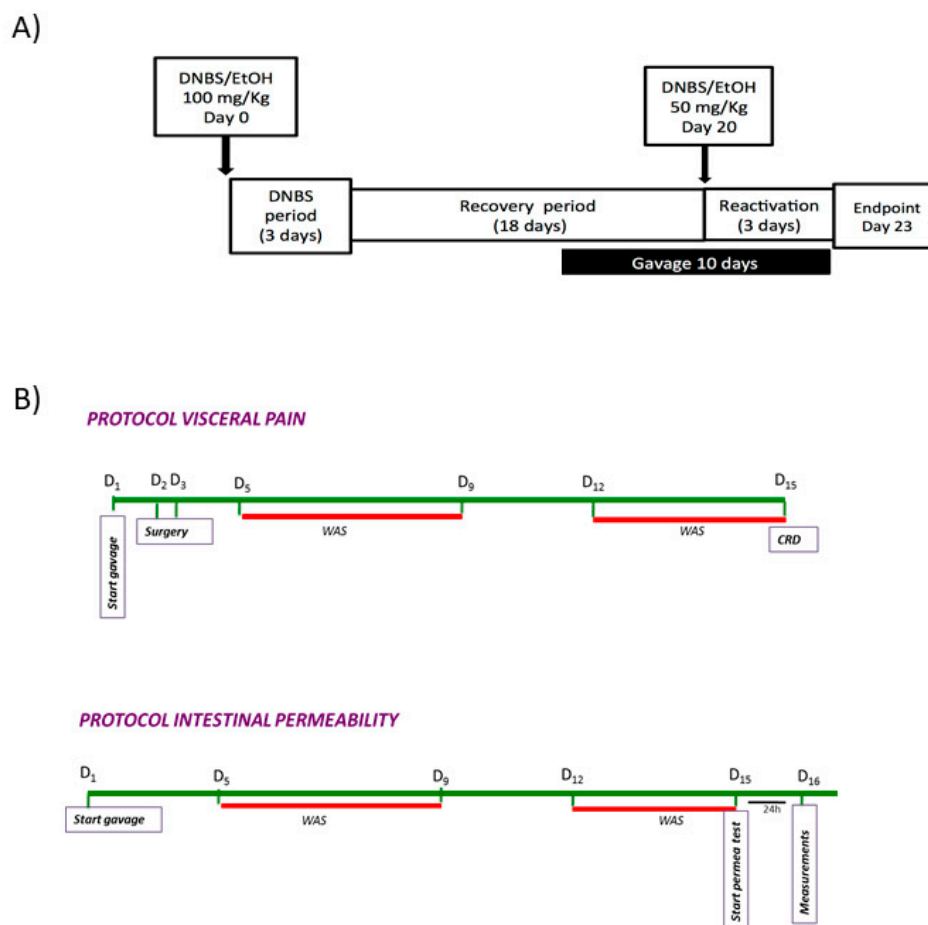

**Figure S1. LGI and WAS models.** Time course protocols employed for LGI (A) and WAS (B) experiments. See Materials and Methods section for details on these protocols.

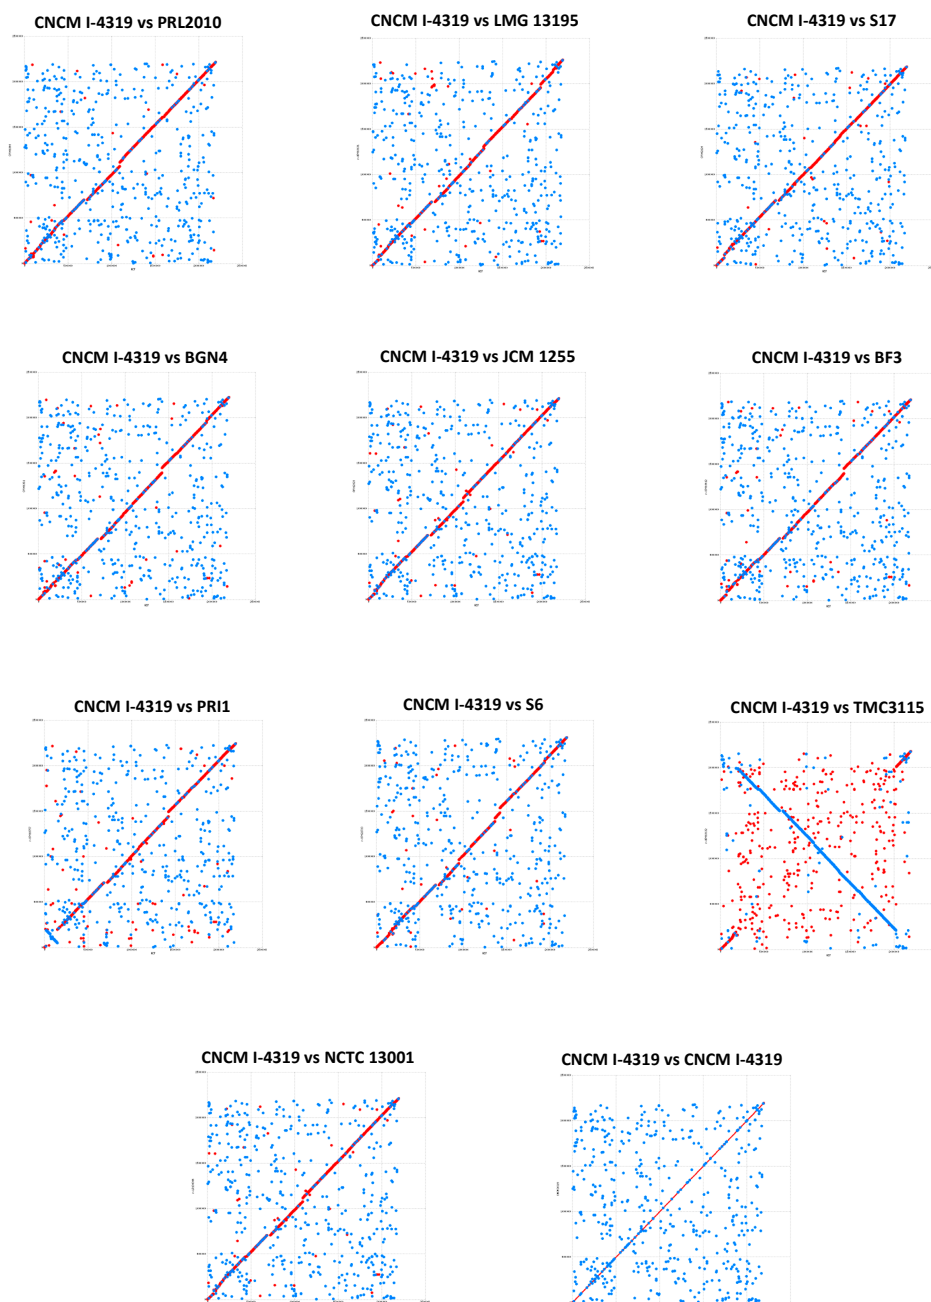

**Figure S2.** Dotplot alignments of fully sequenced *B. bifidum* genomes. Dotplot alignment showing the sequence synteny of *B. bifidum* CNCM I-4319 and 10 publicly available and fully sequenced *B. bifidum* genomes.
